# Supplementary material
Source: publisher site journal article supplement (https://www.degruyterbrill.com/publication/journal_key/ECON/downloadAsset/ECON_CFP_ECON_Special%20Issue%20Shapes%20of%20Performance%20Evaluation%202nd%20Edition.pdf)
Supplement: Supplementary file 1 [file ECON_CFP_ECON_Special%20Issue%20Shapes%20of%20Performance%20Evaluation%202nd%20Edition.pdf]

# SPECIAL ISSUE: SHAPES OF PERFORMANCE EVALUATION IN ECONOMICS AND MANAGEMENT DECISION—2nd EDITION

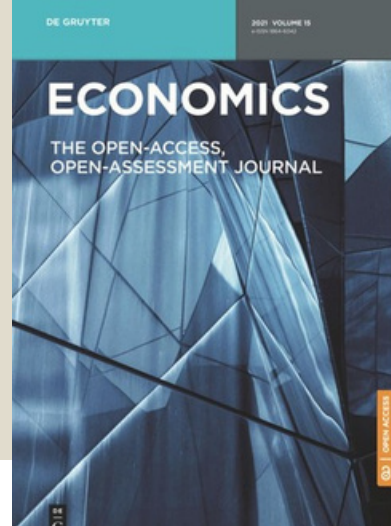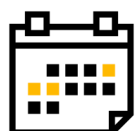

## Submission period:

01 May 2025 - 30  
April 2026

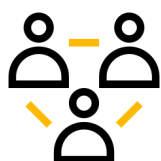

## Lead Guest Editor:

**S. A. Edalatpanah**

Ayandegan Institute of Higher  
Education, Iran  
(s.a.edalatpanah@aihe.ac.ir)

## Guest Editors:

**Peter Wanke**

Universidade Federal do Rio de  
Janeiro, Rio de Janeiro, Brazil  
(peter@coppead.ufrj.br)

**Yong Tan**

University of Bradford, Bradford,  
UK  
(y.tan9@bradford.ac.uk)

## Description

Performance evaluation is crucial for informed decision-making and strategic management within economics and business organizations. Following the success of its first edition, this Special Issue seeks cutting-edge theoretical and empirical studies addressing contemporary economic trends, such as sustainable investments, the digital economy and transformation, economic resilience, entrepreneurship, environmental-economic policy, technological innovations, economic policies under uncertainty, and advanced analytical methods. Submissions specifically addressing ESG performance and green finance remain welcome but should be directed toward the dedicated Special Issue, "The Economics of Green Innovation Financing and Response to Climate Change," listed separately on the journal's Special Issues webpage. Contributions utilizing cutting-edge quantitative methods, AI-driven analytics, and interdisciplinary perspectives that provide actionable insights for policymakers, economists, and business practitioners are encouraged. Contributions should bridge contemporary economic challenges and innovative performance evaluation strategies to facilitate informed management.

## Fees

The standard article processing charge (APC) for accepted papers is 1050 EUR. For details regarding APC, funding support options, and waiver policies, please visit the journal website.

[https://www.degruyter.com/publication/journal\\_key/ECON/downloadAsset/ECON\\_EC\\_ON\\_Article%20Processing%20Charges.pdf](https://www.degruyter.com/publication/journal_key/ECON/downloadAsset/ECON_EC_ON_Article%20Processing%20Charges.pdf)

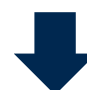

## **Scope and Potential Topics**

- Innovative methods in economic and management performance evaluation
- Sustainability measurement, reporting, and performance optimization
- Economic modeling and decision-making under uncertainty
- Digital economy and economic digital transformation
- Economic resilience and crisis management strategies
- Corporate Social Responsibility (CSR) and sustainability performance
- Entrepreneurship and economic growth strategies
- Advanced analytics, and AI in economic decision-making
- Operational strategies and economic performance
- Economic modeling for technological innovation and development
- Strategic management analytics for informed policy and managerial decisions
- Efficiency measurement and data-driven approaches to operational excellence
- Organizational performance and corporate governance in emerging economies
- Lean production systems
- Computational finance and asset pricing
- Information systems and e-business
- Forecasting and predictive analytics
- Dark side of management decisions

## **How To Submit**

Authors are invited to submit manuscripts through the journal's online submission system <https://www.editorialmanager.com/econjournal/>. Please clearly select the Special Issue: "Shapes of Performance Evaluation —2nd Edition" during submission. All submissions will undergo a rigorous peer-review process, following the journal guidelines. Manuscripts must be original, unpublished, and not under consideration elsewhere. Detailed submission guidelines and formatting instructions can be found on the journal website. <https://www.degruyterbrill.com/journal/key/econ/html#editorial>
